# Supplementary material
Source: PubMed Central journal article supplement (PMC3776309)
Supplement: NIHMS493192-supplement-Supplemental_Materials_A.pdf [file NIHMS493192-supplement-Supplemental_Materials_A.pdf]

# The only thing better than coffee and a cigarette is coffee and no cigarette.

Quitting smoking isn't easy. But new Commit® Cappuccino stop smoking lozenges can help. They not only calm cravings, but also soothe the irritability you get when quitting. And they're tasty, too.

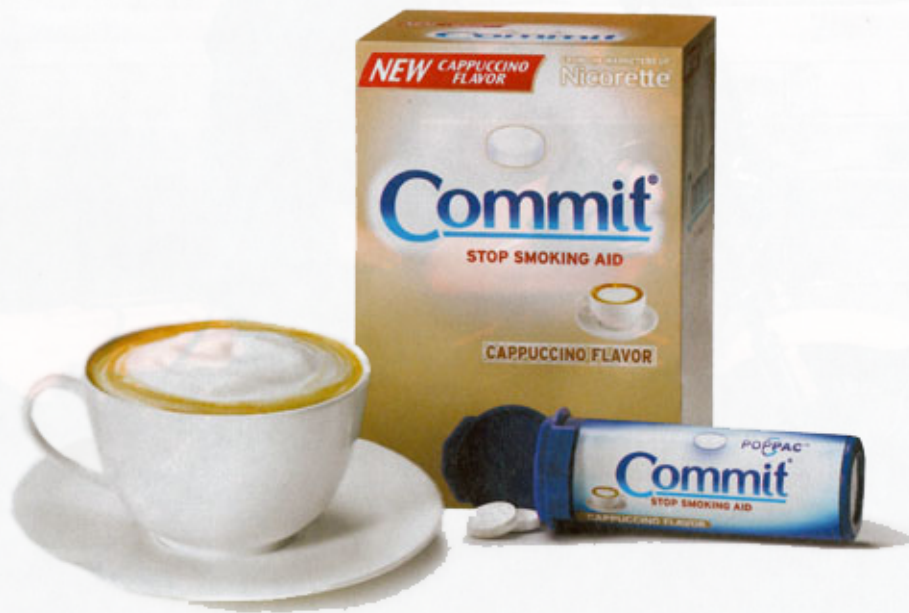

**Soothe Calm Commit**

Use as directed. Individual results may vary. Support program improves chances of success. ©2008 GlaxoSmithKline Consumer Healthcare, L.P.

Free starter pack at  
[commitlozenge.com](http://commitlozenge.com)

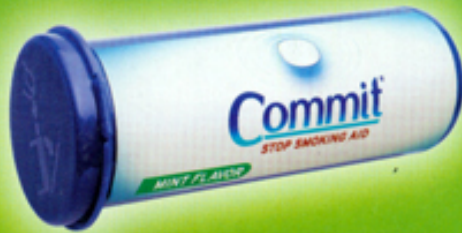

If that last quit attempt  
left a bad taste in your mouth, try this.

Introducing Mint Commit®. The tastier stop-smoking lozenge clinically proven to help you quit smoking. In fact, the 4mg lozenge actually doubles your chances of quitting.\* And now it's available in a handy new Pop Pac.

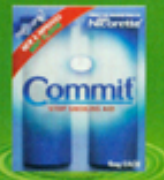

Real help. Real hope.

Use as directed. Take one lozenge every 1-2 hours. Individual results may vary. Support program improves chances of success. © 2006 GlaxoSmithKline Consumer Healthcare, L.P.

\*Vs. placebo

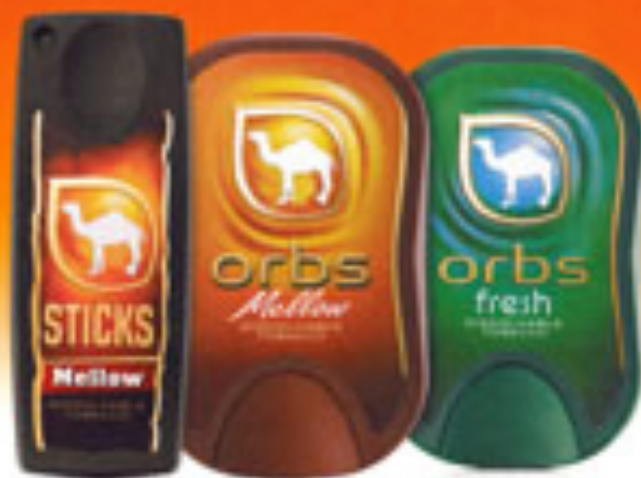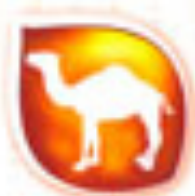

# dissolvable TOBACCO

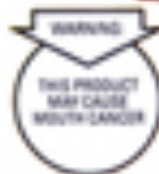

3 Unique Ways to Enjoy Tobacco

©2008 R.J. REYNOLDS TOBACCO CO. (37)

© 2011 B&W TOBACCO CO. (B&W)

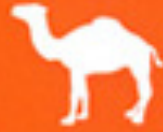

WARNING:  
THIS PRODUCT  
MAY CAUSE GUM  
DISEASE AND  
TOOTH LOSS

# introducing dissolvable tobacco

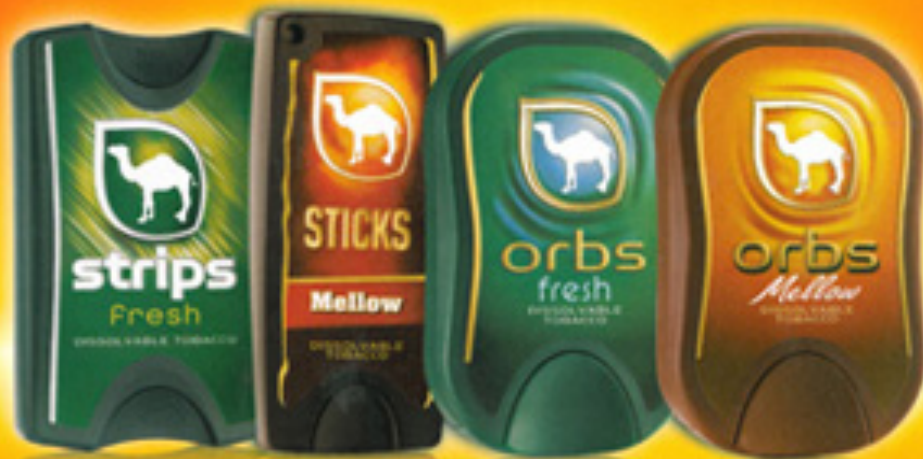

enjoy the evolution

©2009 R.J. REYNOLDS TOBACCO CO.

WARNING:

THIS PRODUCT  
MAY CAUSE  
MOUTH CANCER

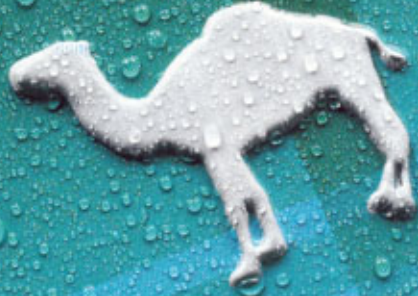

**SINUS**  
frost  
15 POUCHES

your cigarettes may  
get jealous.

[camelsnus.com](http://camelsnus.com)\*

\*WEBSITE RESTRICTED TO LEGAL AGE TOBACCO CONSUMERS.

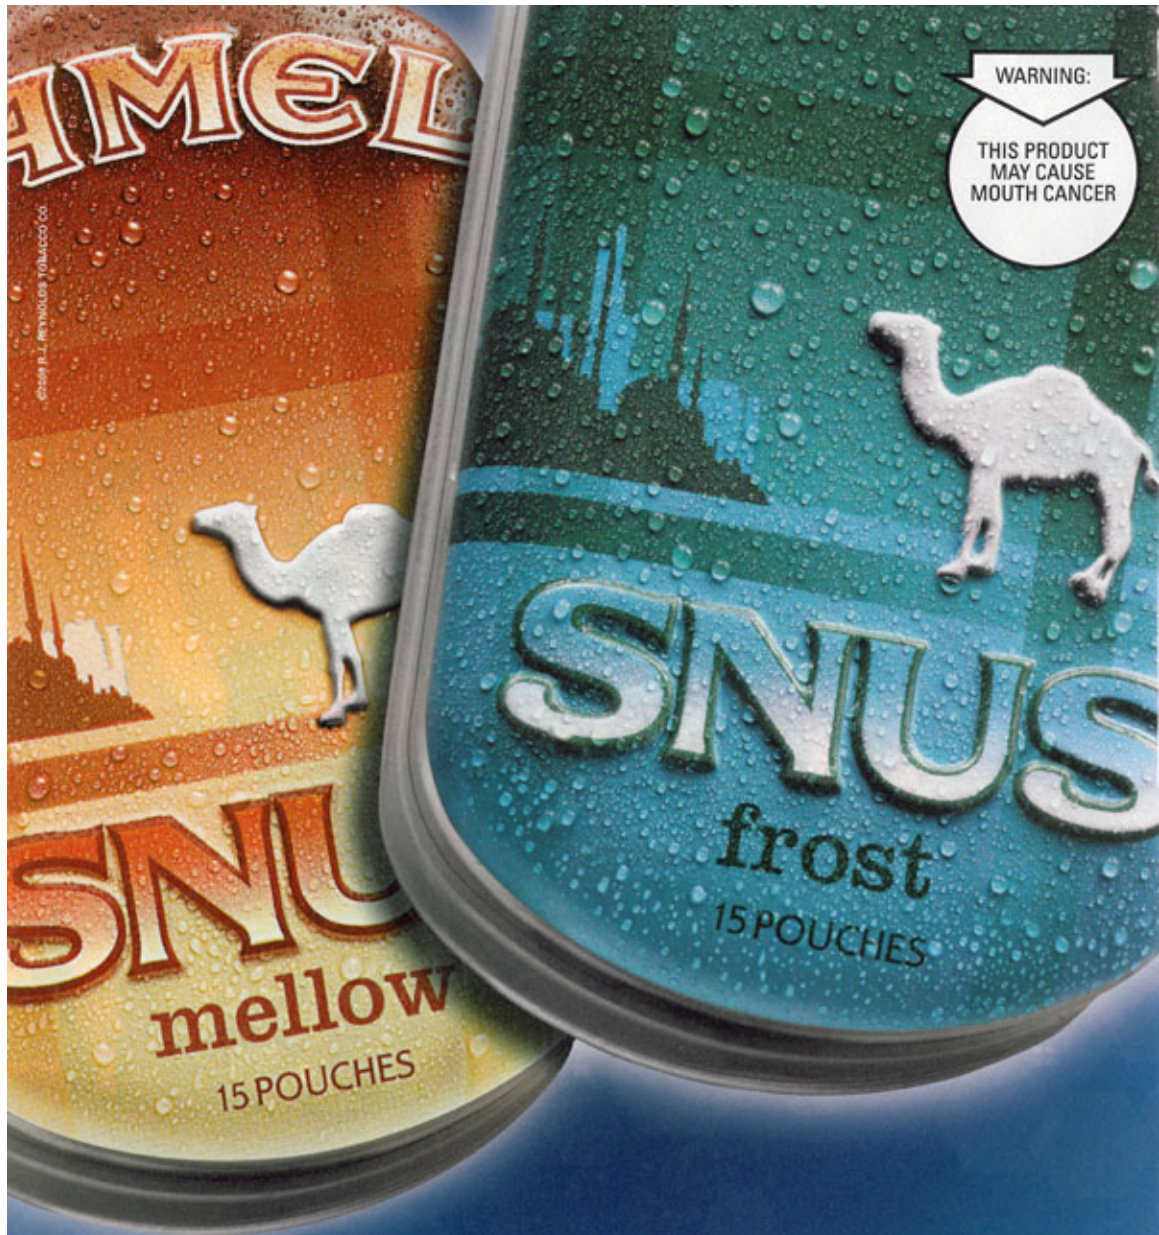

WARNING:

THIS PRODUCT  
MAY CAUSE  
MOUTH CANCER

enjoys taxicabs, subways  
and bar-hopping.

[camelsnus.com](http://camelsnus.com)\*

\*WEBSITE RESTRICTED TO LEGAL AGE TOBACCO CONSUMERS
